# Supplementary material for: Pyrite nanorod arrays as an efficient counter electrode for dye-sensitized solar cells
Source: Royal Society of Chemistry journal article supplement (doi:10.1039/c3ta12347b), 2013-01-01
Supplement: c3ta12347b.pdf [file c3ta12347b.pdf]

# Pyrite Nanorod Arrays as Efficient Counter Electrode for Dye-Sensitized Solar Cells

*Qing-Hui Huang, Tao Ling, Shi-Zhang Qiao and Xi-Wen Du\**

School of Materials Science and Engineering, Tianjin University, Tianjin

300072, P. R. China

\* Corresponding author: [xwdu@tju.edu.cn](mailto:xwdu@tju.edu.cn)

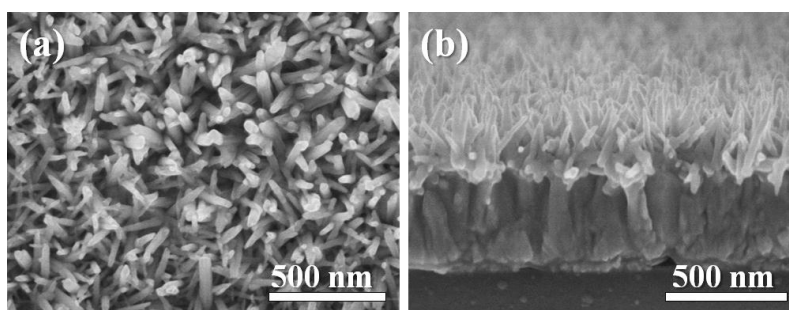

**Figure S1.** The morphology of the FeOOH nanorod arrays produced by 5 h hydrothermal reaction. (a) Top-view and (b) side-view SEM images.

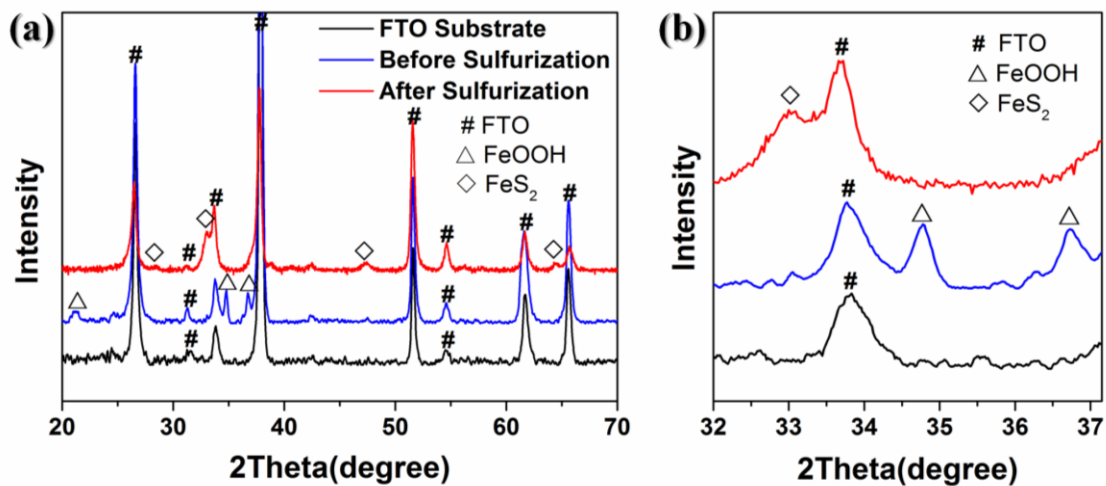

**Figure S2.** The XRD spectra of FeOOH nanorods and FeS<sub>2</sub> nanorods array on FTO substrate. (a) Wide-scan survey spectrum for all elements, (b) precise-scan spectrum in 2θ range of 32~37°.

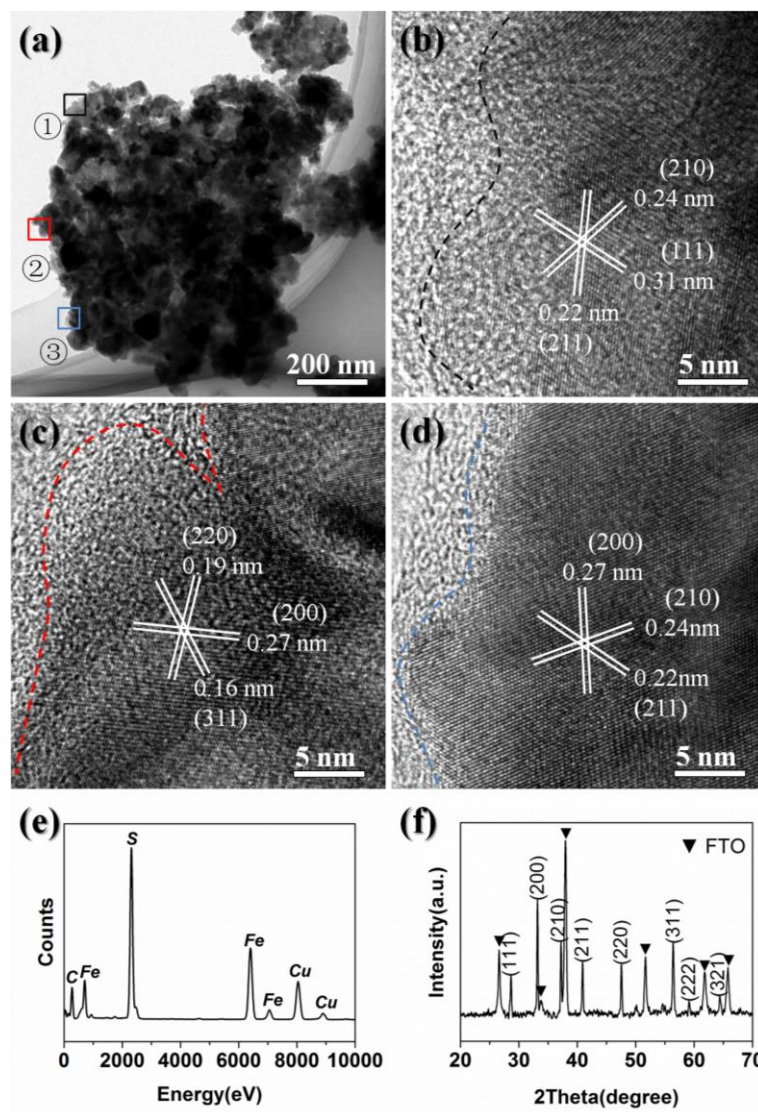

**Figure S3.** The characterizations of FeS<sub>2</sub> nanoparticle. (a) TEM and (b)&(c)&(d) HRTEM images, (e) EDS spectrum, (f) XRD pattern (with FTO substrate).

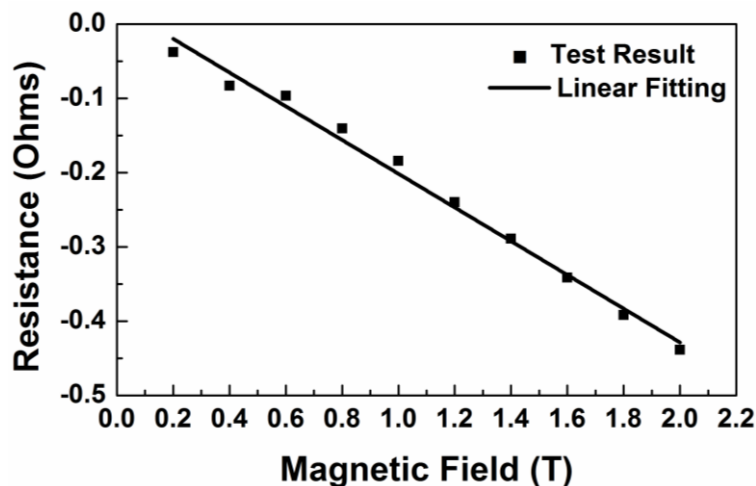

**Figure S4.** Hall Effect measurements of FeS<sub>2</sub> nanorod arrays, the slope of the pattern is  $2.27 \times 10^{-4}$  Ohm/T.

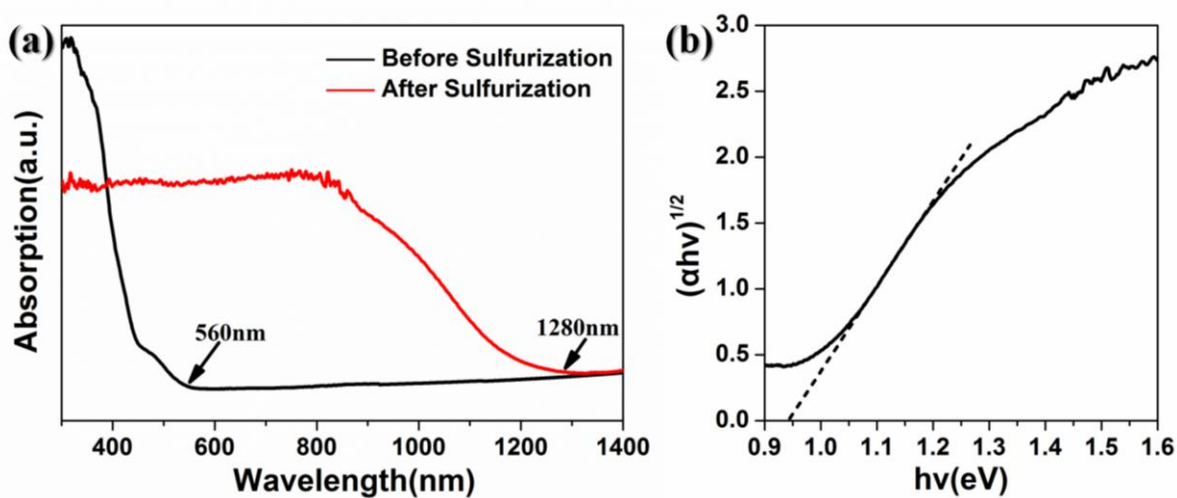

**Figure S5.** Absorption properties of FeOOH and FeS<sub>2</sub> nanorod arrays. (a) UV-Vis absorption spectra of FeOOH and FeS<sub>2</sub> nanorods arrays. (b)  $(\alpha h\nu)^{1/2}$ - $h\nu$  plot of FeS<sub>2</sub> nanorods array.

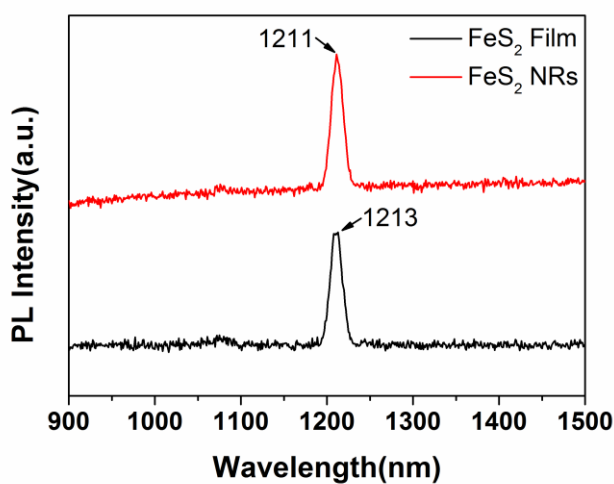

**Figure S6.** Photoluminescence spectra of the as-prepared FeS<sub>2</sub> nanostructures.

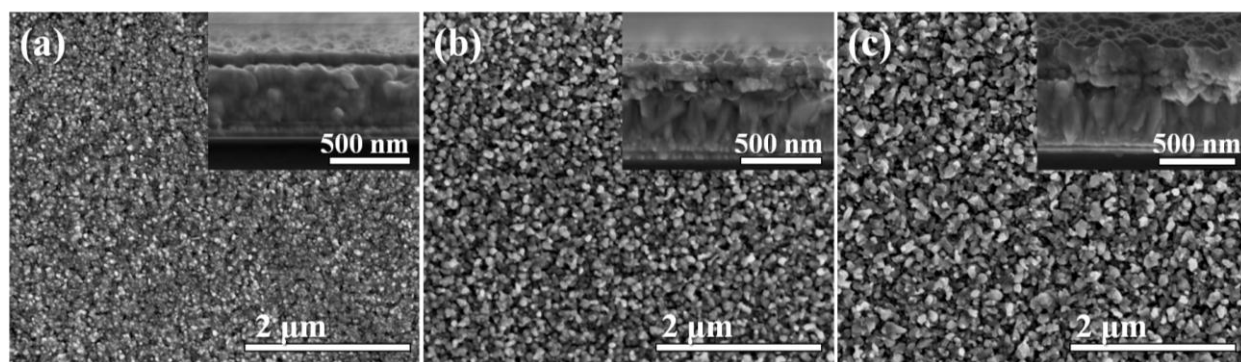

**Figure S7.** SEM images of FeS<sub>2</sub> films with different thicknesses. (a) 100 nm, (b) 200 nm and (c) 400 nm. The insets are the corresponding cross-sectional images.

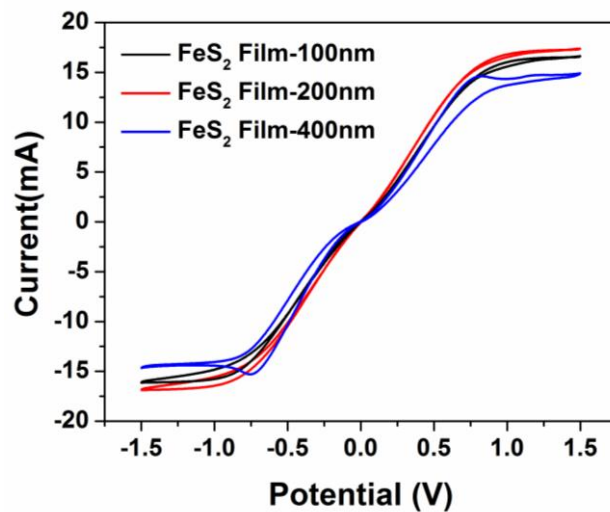

**Figure S8.** CV plots of FeS<sub>2</sub> films with different thicknesses.

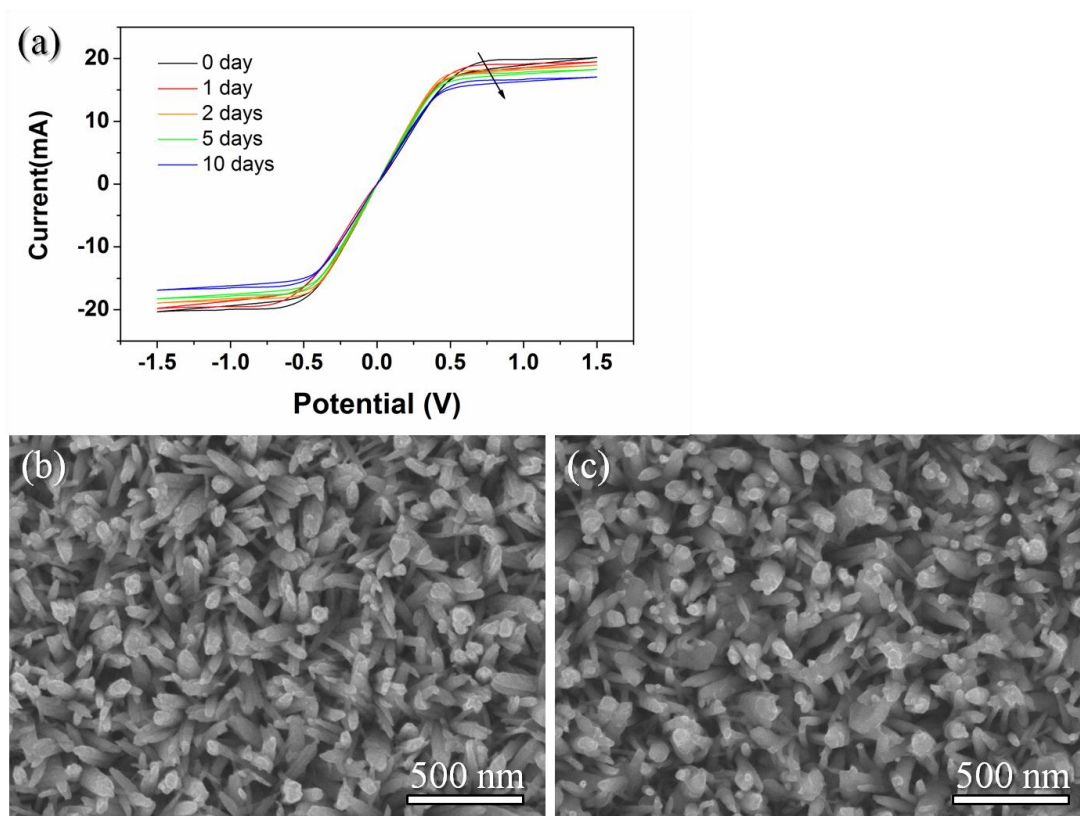

**Figure S9.** Stability of FeS<sub>2</sub> NR arrays in iodide electrolyte. (a) CV plots of FeS<sub>2</sub> NR arrays at different aging times. SEM images of (b) as-prepared FeS<sub>2</sub> NR arrays and (c) those being soaked in electrolyte for 10 days.
